# Supplementary material
Source: PubMed Central journal article supplement (PMC3486302)
Supplement: JVI.01477-12_zjv999096730so1.pdf [file JVI.01477-12_zjv999096730so1.pdf]

**Supplementary Table 1. Comparison of areas under the curve<sup>a</sup> and mean peak viral titers<sup>b</sup> of *wt* and *ca* influenza viruses between HAEC, MDCK, and NHBE cell cultures.**

| Virus                           | Subtype | <i>P</i> values <sup>c</sup>                             |                                |                                |
|---------------------------------|---------|----------------------------------------------------------|--------------------------------|--------------------------------|
|                                 |         | HAEC <i>vs</i><br>MDCK                                   | HAEC <i>vs</i><br>NHBE         | MDCK <i>vs</i><br>NHBE         |
| <i>wt</i> A/California/10/78    | H1N1    | < <b>0.01</b> <sup>a</sup> (< <b>0.01</b> <sup>b</sup> ) | < <b>0.05</b> (< <b>0.01</b> ) | < <b>0.05</b> (> 0.05)         |
| <i>ca</i> A/California/10/78    | H1N1    | < <b>0.01</b> (< <b>0.01</b> )                           | > 0.05 (> 0.05)                | < <b>0.01</b> (< <b>0.01</b> ) |
| <i>wt</i> A/Alaska/6/77         | H3N2    | < <b>0.01</b> (< <b>0.01</b> )                           | < <b>0.01</b> (< <b>0.01</b> ) | > 0.05 (> 0.05)                |
| <i>ca</i> A/Alaska/6/77         | H3N2    | < <b>0.01</b> (< <b>0.01</b> )                           | < <b>0.01</b> (< <b>0.01</b> ) | > 0.05 (> 0.05)                |
| <i>wt</i> A/Washington/897/80   | H3N2    | < <b>0.01</b> (< <b>0.01</b> )                           | < <b>0.05</b> (< <b>0.01</b> ) | > 0.05 (> 0.05)                |
| <i>ca</i> A/Washington/897/80   | H3N2    | < <b>0.01</b> (< <b>0.01</b> )                           | > 0.05 (< <b>0.01</b> )        | < <b>0.01</b> (< <b>0.01</b> ) |
| <i>wt</i> A/New Caledonia/20/99 | H1N1    | ND                                                       | ND                             | < <b>0.01</b> (< <b>0.01</b> ) |
| <i>ca</i> A/New Caledonia/20/99 | H1N1    | ND                                                       | ND                             | < <b>0.05</b> (< <b>0.01</b> ) |
| <i>wt</i> A/Panama/2007/99      | H3N2    | ND                                                       | ND                             | < <b>0.05</b> (> 0.05)         |
| <i>ca</i> A/Panama/2007/99      | H3N2    | ND                                                       | ND                             | > 0.05 (< <b>0.05</b> )        |
| <i>wt</i> A/Wyoming/03/03       | H3N2    | ND                                                       | ND                             | < <b>0.05</b> (< <b>0.01</b> ) |
| <i>ca</i> A/Wyoming/03/03       | H3N2    | ND                                                       | ND                             | > 0.05 (> 0.05)                |
| <i>ca</i> A/Ann Arbor/6/60      | H2N2    | ND                                                       | ND                             | < <b>0.05</b> (< <b>0.01</b> ) |
| <i>wt</i> A/Leningrad/134/57    | H2N2    | ND                                                       | ND                             | > 0.05 (< <b>0.05</b> )        |
| <i>ca</i> A/Leningrad/134/17/57 | H2N2    | ND                                                       | ND                             | > 0.05 (> 0.05)                |
| <i>ca</i> A/Leningrad/134/47/57 | H2N2    | ND                                                       | ND                             | < <b>0.05</b> (< <b>0.05</b> ) |
| <i>ca</i> A/Leningrad/134/80/57 | H2N2    | ND                                                       | ND                             | < <b>0.01</b> (< <b>0.01</b> ) |
| <i>ca</i> A/chicken/HK/G9/97    | H9N2    | ND                                                       | ND                             | < <b>0.05</b> (< <b>0.01</b> ) |
| <i>wt</i> B/Hong Kong/330/01    | —       | ND                                                       | ND                             | < <b>0.05</b> (< <b>0.01</b> ) |
| <i>ca</i> B/Hong Kong/330/01    | —       | ND                                                       | ND                             | > 0.05 (> 0.05)                |

<sup>c</sup> *P* value for comparison of AUC and mean peak titers between cell lines (one-way ANOVA or unpaired *t*-test).
